# Supplementary material for: Revisiting the missing protein-coding gene catalog of the domestic dog
Source: Springer Nature journal article supplement (doi:10.1186/1471-2164-10-62), 2009-02-04
Supplement: Additional file 7 [file 1471-2164-10-62-s7.pdf]

**Additional data file 6:** Human gene-expression profile characterization per tissue with significant over (red) and under (blue) representation

| <b>testis</b>   |               |                                                                                      |                                  |
|-----------------|---------------|--------------------------------------------------------------------------------------|----------------------------------|
| <i>Input ID</i> | <i>Symbol</i> | <i>Name</i>                                                                          | <b>Over/Under representation</b> |
| ENSG00000149609 | C20orf144     | chromosome 20 open reading frame 144                                                 | 2.450e-09                        |
| ENSG00000122145 | TBX22         | T-box 22                                                                             | 2.654e-08                        |
| ENSG00000152463 | OLAH          | oleoyl-ACP hydrolase                                                                 | 6.544e-06                        |
| ENSG00000159648 |               |                                                                                      | 1.992e-05                        |
| ENSG00000176720 | BOK           | BCL2-related ovarian killer                                                          | -1.030e-03                       |
| ENSG00000137497 | NUMA1         | nuclear mitotic apparatus protein 1                                                  | -6.864e-03                       |
| ENSG00000123360 | PDE1B         | phosphodiesterase 1B, calmodulin-dependent                                           | -1.135e-02                       |
| ENSG00000178015 | GPR150        | G protein-coupled receptor 150                                                       | 4.872e-02                        |
| ENSG00000184900 | SUMO3         | SMT3 suppressor of mif two 3 homolog 3 ( <i>S. cerevisiae</i> )                      | 9.086e-02                        |
| ENSG00000154274 | C4orf19       | chromosome 4 open reading frame 19                                                   | -1.720e-01                       |
| ENSG00000145014 | TMEM44        | transmembrane protein 44                                                             | -4.087e-01                       |
| ENSG00000140093 | SERPINA10     | serpin peptidase inhibitor, clade A (alpha-1 antiproteinase, antitrypsin), member 10 | -4.376e-01                       |
| ENSG00000153029 | MR1           | major histocompatibility complex, class I-related                                    | 5.781e-01                        |
| <b>kidney</b>   |               |                                                                                      |                                  |
| <i>Input ID</i> | <i>Symbol</i> | <i>Name</i>                                                                          | <b>Over/Under representation</b> |
| ENSG00000173610 | UGT2A1        | UDP glucuronosyltransferase 2 family, polypeptide A1                                 | 9.938e-06                        |
| ENSG00000126231 | PROZ          | protein Z, vitamin K-dependent plasma glycoprotein                                   | 7.731e-05                        |
| ENSG00000137497 | NUMA1         | nuclear mitotic apparatus protein 1                                                  | -4.014e-04                       |
| ENSG00000157111 | TMEM171       | transmembrane protein 171                                                            | 7.460e-04                        |

|                 |         |                                                                        |            |
|-----------------|---------|------------------------------------------------------------------------|------------|
| ENSG00000153029 | MR1     | major histocompatibility complex, class I-related                      | 2.090e-03  |
| ENSG00000154274 | C4orf19 | chromosome 4 open reading frame 19                                     | 1.130e-02  |
| ENSG00000176720 | BOK     | BCL2-related ovarian killer phosphodiesterase 1B, calmodulin-dependent | 7.222e-02  |
| ENSG00000123360 | PDE1B   |                                                                        | -9.801e-02 |
| ENSG00000152463 | OLAH    | oleoyl-ACP hydrolase                                                   | -1.497e-01 |
| ENSG00000184900 | SUMO3   | SMT3 suppressor of mif two 3 homolog 3 (S. cerevisiae)                 | -3.119e-01 |
| ENSG00000145014 | TMEM44  | transmembrane protein 44                                               | -4.737e-01 |

### Placenta

| <i>Input ID</i> | <i>Symbol</i> | <i>Name</i>                                            | <b>Over/Under representation</b> |
|-----------------|---------------|--------------------------------------------------------|----------------------------------|
| ENSG00000154274 | C4orf19       | chromosome 4 open reading frame 19                     | 1.024e-24                        |
| ENSG00000204614 | TRIM40        | tripartite motif-containing 40                         | 4.862e-17                        |
| ENSG00000152463 | OLAH          | oleoyl-ACP hydrolase                                   | 4.751e-09                        |
| ENSG00000137497 | NUMA1         | nuclear mitotic apparatus protein 1                    | -1.449e-04                       |
| ENSG00000153029 | MR1           | major histocompatibility complex, class I-related      | 3.427e-03                        |
| ENSG00000176720 | BOK           | BCL2-related ovarian killer                            | -4.179e-03                       |
| ENSG00000149609 | C20orf144     | chromosome 20 open reading frame 144                   | 1.592e-02                        |
| ENSG00000145014 | TMEM44        | transmembrane protein 44                               | -9.665e-02                       |
| ENSG00000183691 | NOG           | noggin                                                 | 2.779e-01                        |
| ENSG00000184900 | SUMO3         | SMT3 suppressor of mif two 3 homolog 3 (S. cerevisiae) | -4.083e-01                       |

### Colon

| <i>Input ID</i> | <i>Symbol</i> | <i>Name</i>                                            | <b>Over/Under representation</b> |
|-----------------|---------------|--------------------------------------------------------|----------------------------------|
| ENSG00000137497 | NUMA1         | nuclear mitotic apparatus protein 1                    | 3.507e-18                        |
| ENSG00000154274 | C4orf19       | chromosome 4 open reading frame 19                     | 2.780e-03                        |
| ENSG00000157111 | TMEM171       | transmembrane protein 171                              | 3.335e-02                        |
| ENSG00000123360 | PDE1B         | phosphodiesterase 1B, calmodulin-dependent             | -1.154e-01                       |
| ENSG00000204614 | TRIM40        | tripartite motif-containing 40                         | 1.349e-01                        |
| ENSG00000152463 | OLAH          | oleoyl-ACP hydrolase                                   | -1.716e-01                       |
| ENSG00000184900 | SUMO3         | SMT3 suppressor of mif two 3 homolog 3 (S. cerevisiae) | -2.861e-01                       |

|                 |        |                                                   |            |
|-----------------|--------|---------------------------------------------------|------------|
| ENSG00000145014 | TMEM44 | transmembrane protein 44                          | -2.998e-01 |
| ENSG00000176720 | BOK    | BCL2-related ovarian killer                       | 4.450e-01  |
| ENSG00000153029 | MR1    | major histocompatibility complex, class I-related | -4.823e-01 |

### Cerebrum

| <i>Input ID</i> | <i>Symbol</i> | <i>Name</i>                                                                      | <b>Over/Under representation</b> |
|-----------------|---------------|----------------------------------------------------------------------------------|----------------------------------|
| ENSG00000123360 | PDE1B         | phosphodiesterase 1B, calmodulin-dependent                                       | 1.429e-06                        |
| ENSG00000176720 | BOK           | BCL2-related ovarian killer                                                      | 1.325e-04                        |
| ENSG00000137497 | NUMA1         | nuclear mitotic apparatus protein 1                                              | -4.363e-04                       |
| ENSG00000154274 | C4orf19       | chromosome 4 open reading frame 19                                               | -1.253e-01                       |
| ENSG00000184900 | SUMO3         | SMT3 suppressor of mif two 3 homolog 3 (S. cerevisiae)                           | 1.703e-01                        |
| ENSG00000165202 | OR1Q1         | olfactory receptor, family 1, subfamily Q, member 1                              | 1.747e-01                        |
| ENSG00000178015 | GPR150        | G protein-coupled receptor 150                                                   | 2.058e-01                        |
| ENSG00000152463 | OLAH          | oleoyl-ACP hydrolase                                                             | 2.378e-01                        |
| ENSG00000145014 | TMEM44        | transmembrane protein 44                                                         | -4.770e-01                       |
| ENSG00000149516 | MS4A3         | membrane-spanning 4-domains, subfamily A, member 3 (hematopoietic cell-specific) | -4.787e-01                       |

### Brain

| <i>Input ID</i> | <i>Symbol</i> | <i>Name</i>                                         | <b>Over/Under representation</b> |
|-----------------|---------------|-----------------------------------------------------|----------------------------------|
| ENSG00000123360 | PDE1B         | phosphodiesterase 1B, calmodulin-dependent          | 6.832e-18                        |
| ENSG00000154274 | C4orf19       | chromosome 4 open reading frame 19                  | -6.731e-04                       |
| ENSG00000152463 | OLAH          | oleoyl-ACP hydrolase                                | 8.185e-03                        |
| ENSG00000177291 |               |                                                     | 1.254e-02                        |
| ENSG00000137497 | NUMA1         | nuclear mitotic apparatus protein 1                 | -8.502e-02                       |
| ENSG00000165202 | OR1Q1         | olfactory receptor, family 1, subfamily Q, member 1 | 9.962e-02                        |

|                 |           |                                                                 |            |
|-----------------|-----------|-----------------------------------------------------------------|------------|
| ENSG00000184900 | SUMO3     | SMT3 suppressor of mif two 3 homolog 3 ( <i>S. cerevisiae</i> ) | 1.456e-01  |
| ENSG00000145014 | TMEM44    | transmembrane protein 44                                        | 1.479e-01  |
| ENSG00000153029 | MR1       | major histocompatibility complex, class I-related               | 1.636e-01  |
| ENSG00000157111 | TMEM171   | transmembrane protein 171                                       | 3.916e-01  |
| ENSG00000176720 | BOK       | BCL2-related ovarian killer                                     | 4.136e-01  |
| ENSG00000178015 | GPR150    | G protein-coupled receptor 150                                  | 5.097e-01  |
| ENSG00000183691 | NOG       | noggin                                                          | 5.097e-01  |
| ENSG00000149609 | C20orf144 | chromosome 20 open reading frame 144                            | -6.403e-01 |

### Uterus

| <i>Input ID</i> | <i>Symbol</i> | <i>Name</i>                                                     | <b>Over/Under representation</b> |
|-----------------|---------------|-----------------------------------------------------------------|----------------------------------|
| ENSG00000184900 | SUMO3         | SMT3 suppressor of mif two 3 homolog 3 ( <i>S. cerevisiae</i> ) | 1.598e-02                        |
| ENSG00000123360 | PDE1B         | phosphodiesterase 1B, calmodulin-dependent                      | -6.591e-02                       |
| ENSG00000176720 | BOK           | BCL2-related ovarian killer                                     | 1.312e-01                        |
| ENSG00000165202 | OR1Q1         | olfactory receptor, family 1, subfamily Q, member 1             | 1.952e-01                        |
| ENSG00000183691 | NOG           | noggin                                                          | 2.294e-01                        |
| ENSG00000145014 | TMEM44        | transmembrane protein 44                                        | 2.522e-01                        |
| ENSG00000152463 | OLAH          | oleoyl-ACP hydrolase                                            | -2.726e-01                       |
| ENSG00000137497 | NUMA1         | nuclear mitotic apparatus protein 1                             | 3.171e-01                        |
| ENSG00000154274 | C4orf19       | chromosome 4 open reading frame 19                              | -3.420e-01                       |
| ENSG00000153029 | MR1           | major histocompatibility complex, class I-related               | -3.894e-01                       |
| ENSG00000157111 | TMEM171       | transmembrane protein 171                                       | 5.804e-01                        |
